# Supplementary material
Source: Springer Nature journal article supplement (https://www.springermedizin.de/resource/supplementary/12943_2011_994_MOESM11_ESM.pdf/9552098)

A

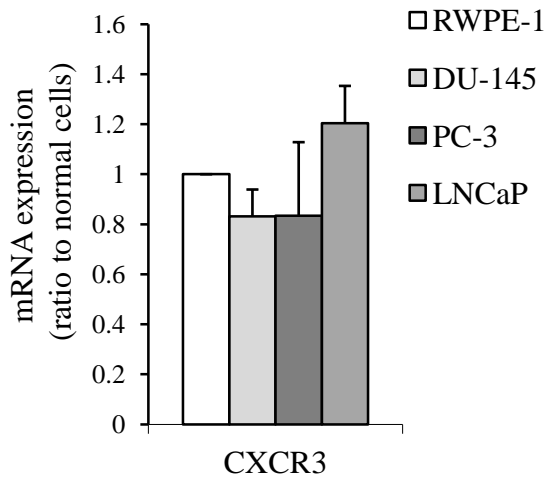

B

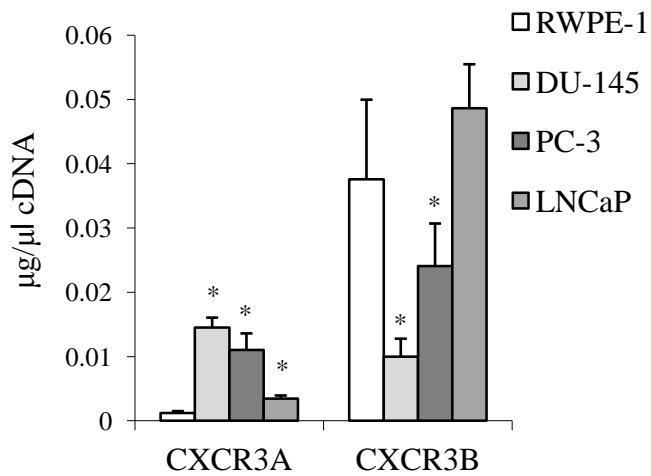

C

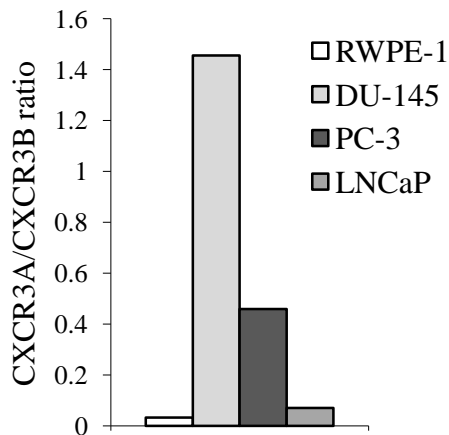

D

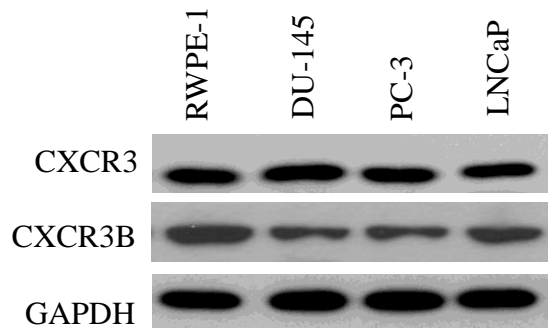

E

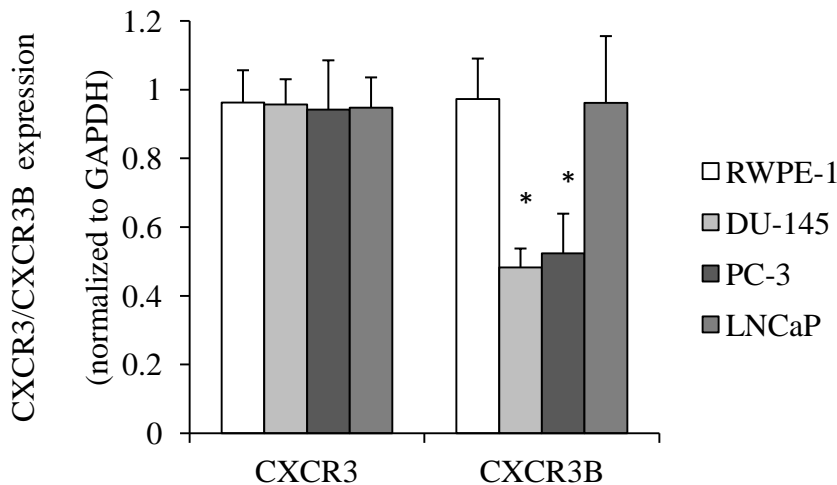

Supplement: MOESM11 [file 9552098]
